# Supplementary material
Source: PubMed Central journal article supplement (PMC2792754)
Supplement: NIHMS160744-supplement-s1.pdf [file NIHMS160744-supplement-s1.pdf]

**Tcf3 and Tcf4 are essential for  
long-term homeostasis of skin epithelia**

Hoang Nguyen<sup>1,3</sup>, Bradley J. Merrill<sup>1,3</sup>,  
Lisa Polak<sup>1</sup>, Maria Nikolova<sup>1</sup>, Michael Rendl<sup>1,3</sup>, Timothy M. Shaver<sup>2</sup>,  
H. Amalia Pasolli<sup>1</sup> and Elaine Fuchs<sup>1</sup>

**Supplemental Material**

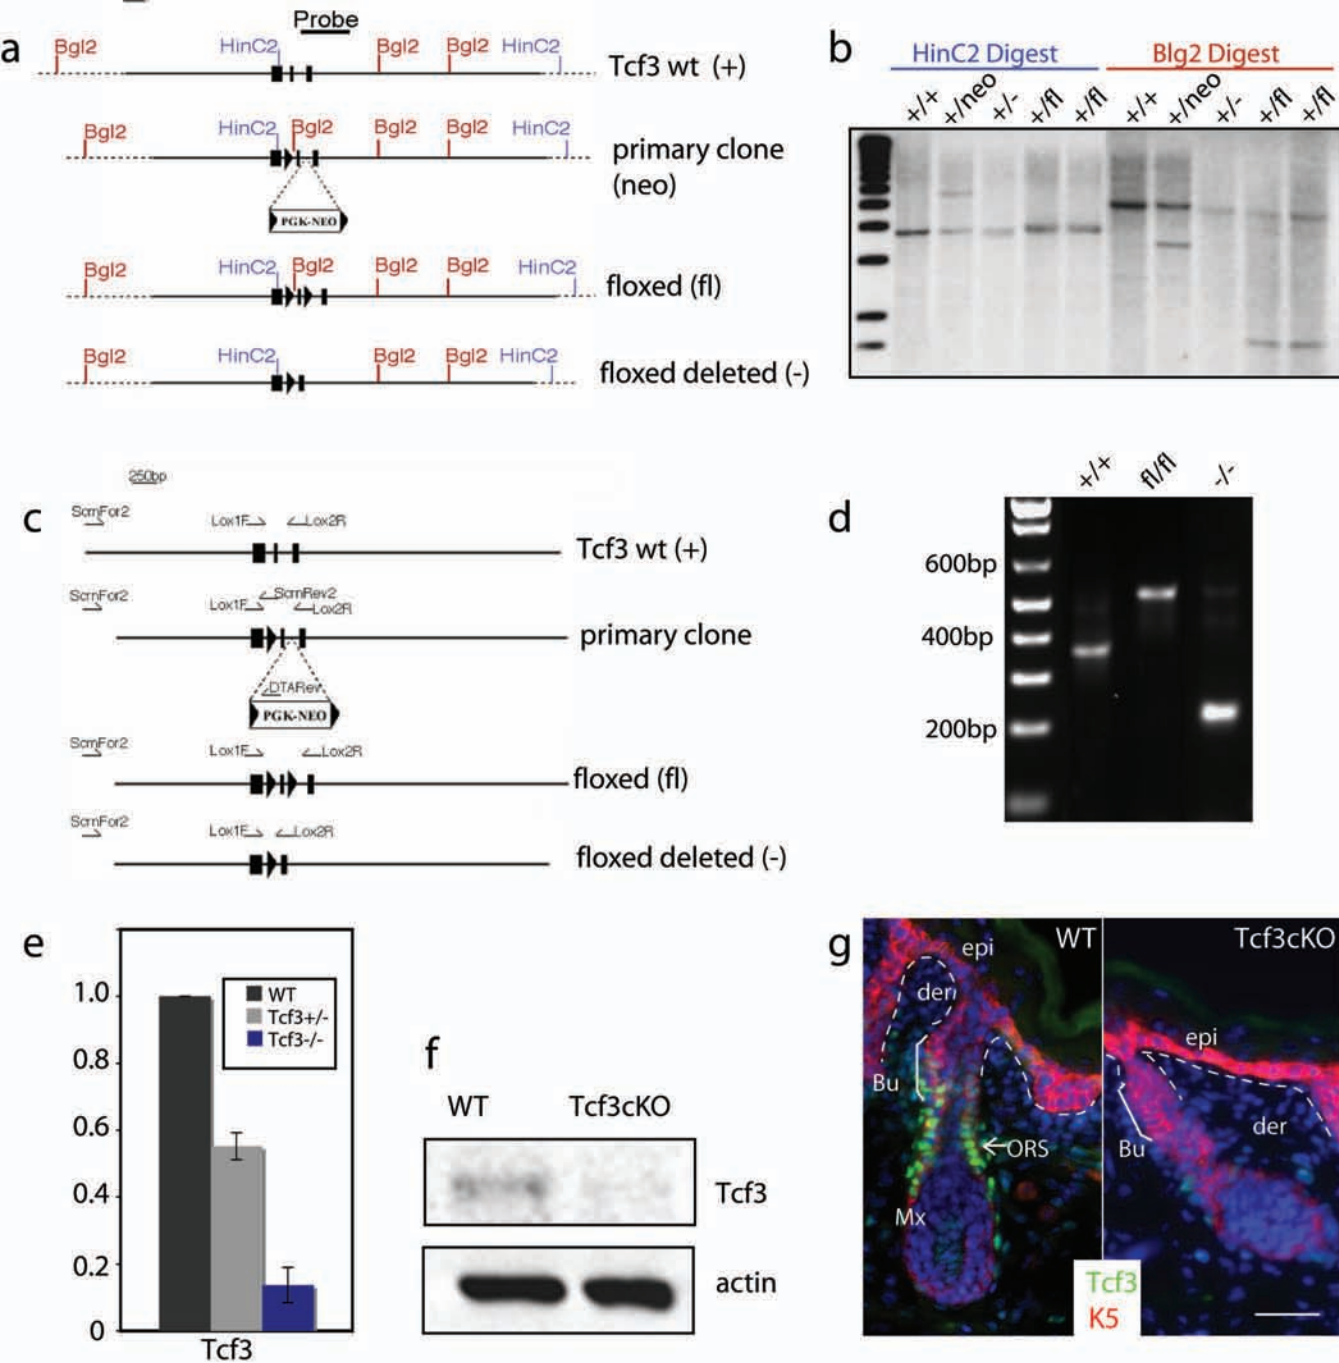

**Supplementary Figure 1.** Conditional ablation of *Tcf3* in the skin. (a) Targeting scheme to introduce two loxP sites flanking exon 2 of *Tcf3*, thereby generating a putative frame shift and premature termination of the protein. Shown are maps of the targeting vector and the targeted *Tcf3* exon 2 before and after Cre recombination; triangles represent loxP sites. (b) Southern blot analysis verified the correct targeting event and the proper Cre-mediated excision of *Neo* gene to yield the *Tcf3* floxed allele. (c) Scheme of the design of genotyping primers that yield PCR products that distinguish WT, floxed, and floxed deleted allele. (d) PCR analysis confirmed the deletion of exon 2 upon Cre recombination. (e) Real Time PCR analysis of mRNAs from FACS-purified basal epidermal cells of WT, *Tcf3*<sup>+/-</sup> and *Tcf3* cKO E17.5 skins. (f-g) Immunoblot and immunofluorescence analyses, respectively, confirmed the efficient loss of *Tcf3* in *Tcf3* cKO E17.5 skin epidermis.  $\beta$ -actin served as the loading control in the immunoblot and K5 serves as the control for the immunofluorescence (DAPI in blue marks the nuclei). Bar represents 20 $\mu$ m.

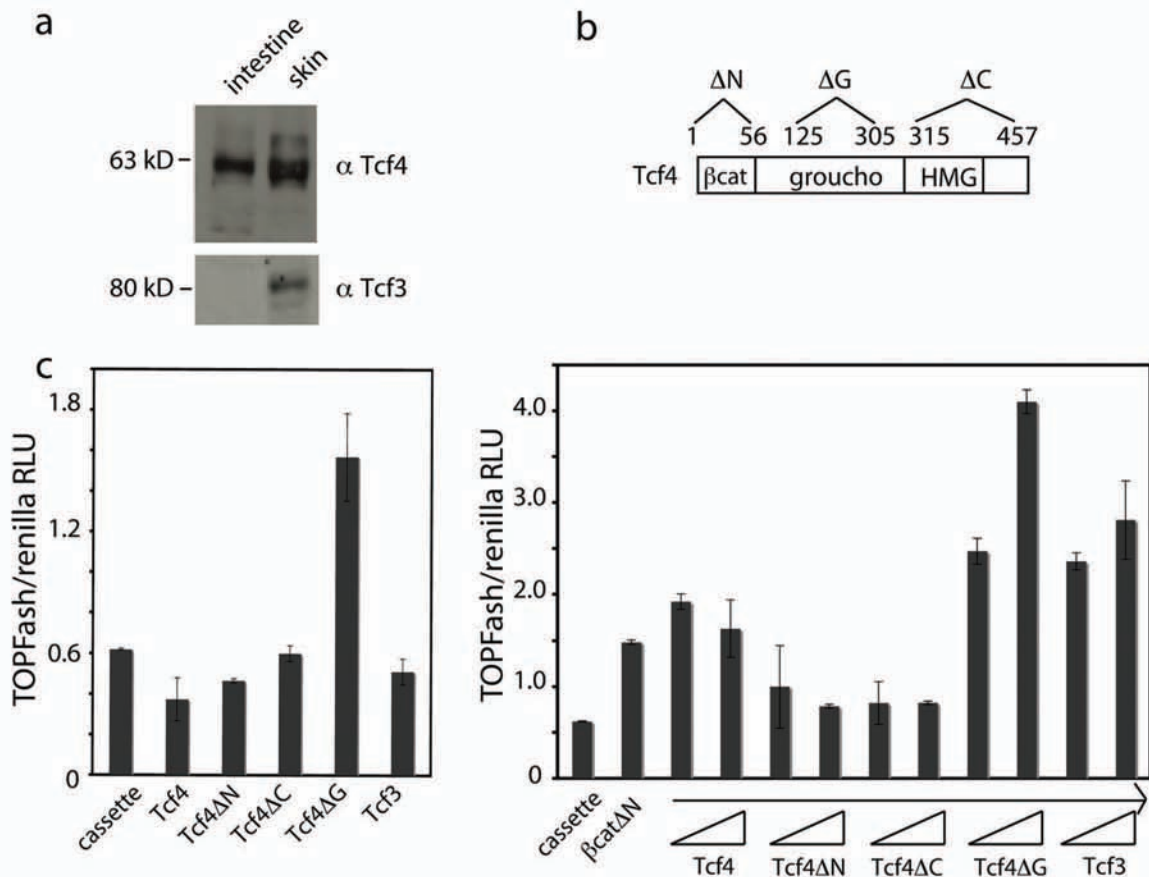

**Supplementary Figure 2.** Tcf4 has repressive activity on WNT reporter TOPFlash *in vitro* (a) Western analysis confirmed that the predominant isoform of Tcf4 in the skin to be the Tcf4B isoform that is expressed in the intestine. (b) Scheme of Tcf4 constructs expressing mutant forms which either lacks the  $\beta$ -catenin binding domain ( $\Delta$ N), or Groucho binding domain ( $\Delta$ G), or the DNA binding domain ( $\Delta$ C). (c) Tcf4 has repressive activity on WNT reporter TOPFlash in keratinocytes and its repressive function requires its binding domain to corepressor Groucho. Note that by lacking the Groucho binding domain, Tcf4 $\Delta$ G has higher basal activating activity on TOPFlash.

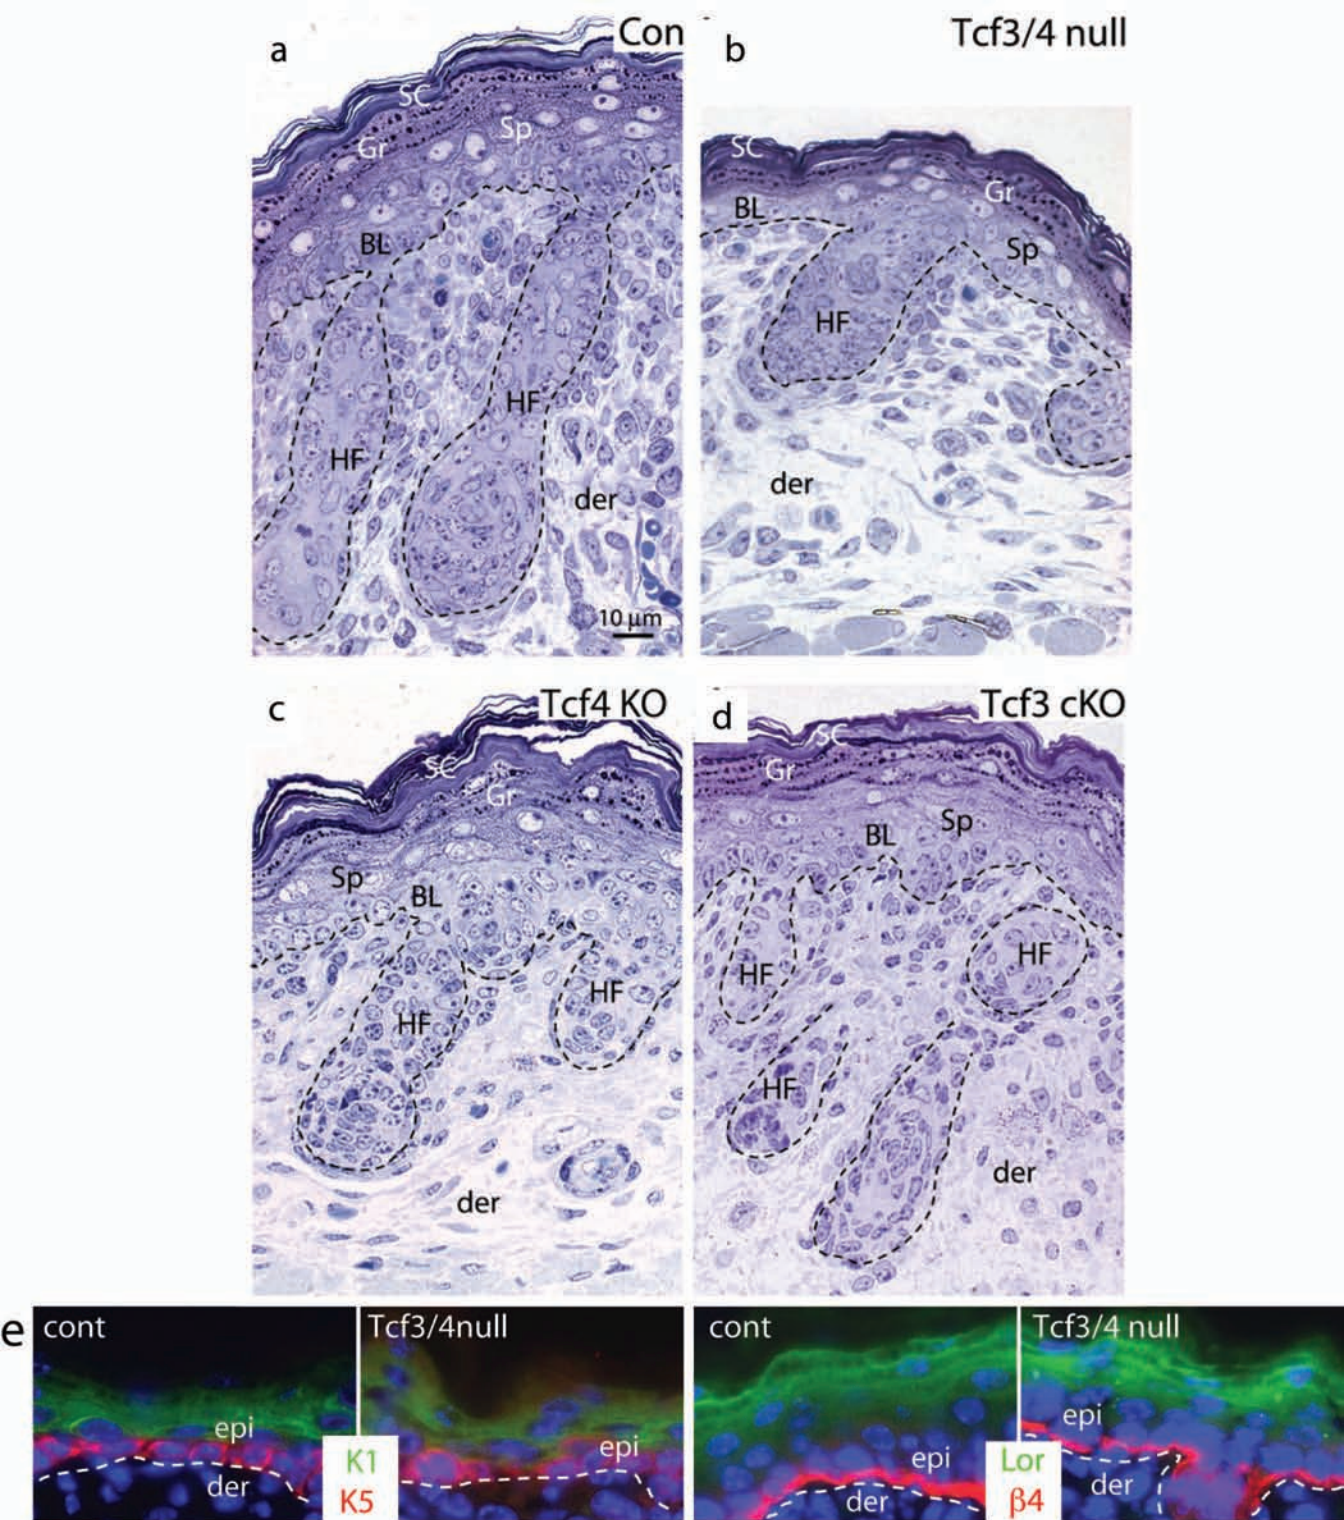

**Supplementary Figure 3.** Histological and immunofluorescence analyses of *Tcf3* and *Tcf4* null mutants. (a-d) Newborn backskins from control, *Tcf4*KO and *Tcf3*cKO, and *Tcf3/4* null were fixed, embedded in Epon, and sectioned (1 $\mu$ m). Sections were stained with toluidine blue and subjected to light microscopic analysis. *Tcf3*cKO and *Tcf4*KO exhibit similar phenotype as the control while the *Tcf3/4* null showed less developed hair follicles and thinner epidermis. SC, stratum corneum; Gr, granular layer; Sp, spinous layer; BL, basal layer; HF, hair follicle; der, dermis. Dotted line delineates the basal lamina. Bar 10 $\mu$ m applies to all panels. (e) Basal (K5), spinous (K1) and granular (Loricrin, Lor) markers are properly expressed in *Tcf3/4* null epidermis.

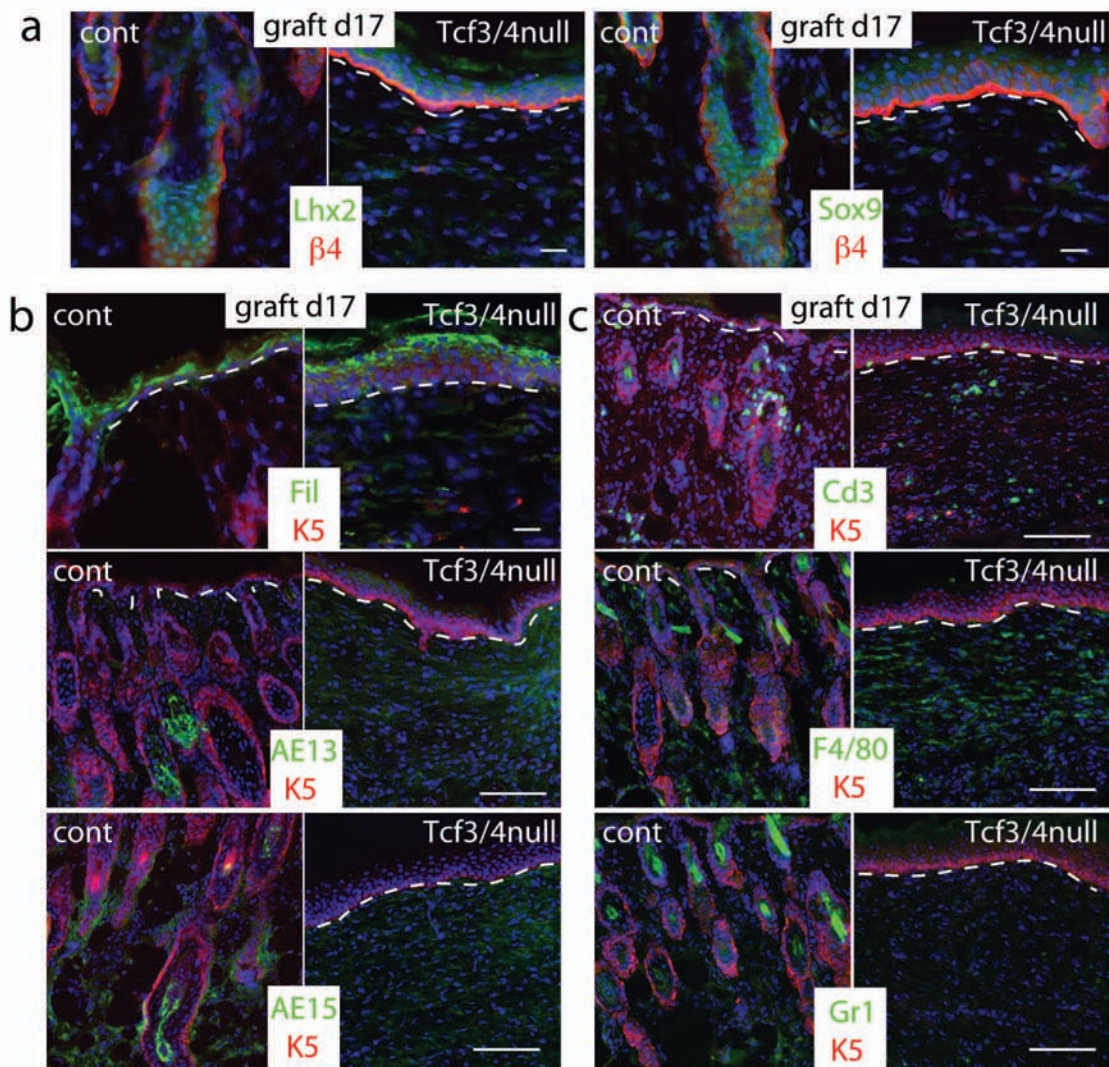

**Supplementary Figure 4.** Hair follicle and immune cell analyses of *Tcf3/4* null vs *Wt* skins at d17 after engraftment. *Tcf3/4* null grafted skin does not maintain hair follicles and does not express follicle stem cell markers Lhx2 and Sox9 (a) or hair differentiation markers AE13 and AE15 (b). At d17 the double null skin still expresses normal epidermal terminal differentiation marker Filaggrin and does not have abnormal inflammation. Expression level of lymphocyte (Cd3), granulocyte (Gr1) and macrophage (F4/80) is comparable in the double null and *Wt* skin. Bar denotes 20 $\mu$ m and 100 $\mu$ m in a and b, respectively.

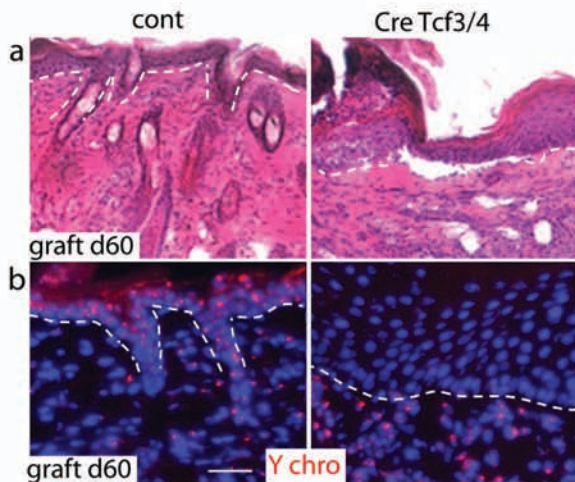

**Supplementary Figure 5.** Skin grafting permits evaluation of the long-term consequences of *Tcf3* and *Tcf4* ablation. (a-b) Skins from P0 male *Tcf3/4* null and control littermates were grafted onto female *Nude* mice and analyzed after 2 months. (a) H&E analysis of grafted skins. Note that after 2 months, the epidermis is drastically altered in architecture, resembling a chronic wound state. (b) Y chromosome FISH shows that in contrast to the control, bordering Y-chromosome negative, female *Nude* epidermal cells have replaced the diminishing *Tcf3/4* null (male) epidermal cells, while the underlying dermis of the graft remains *Tcf3/4* null.

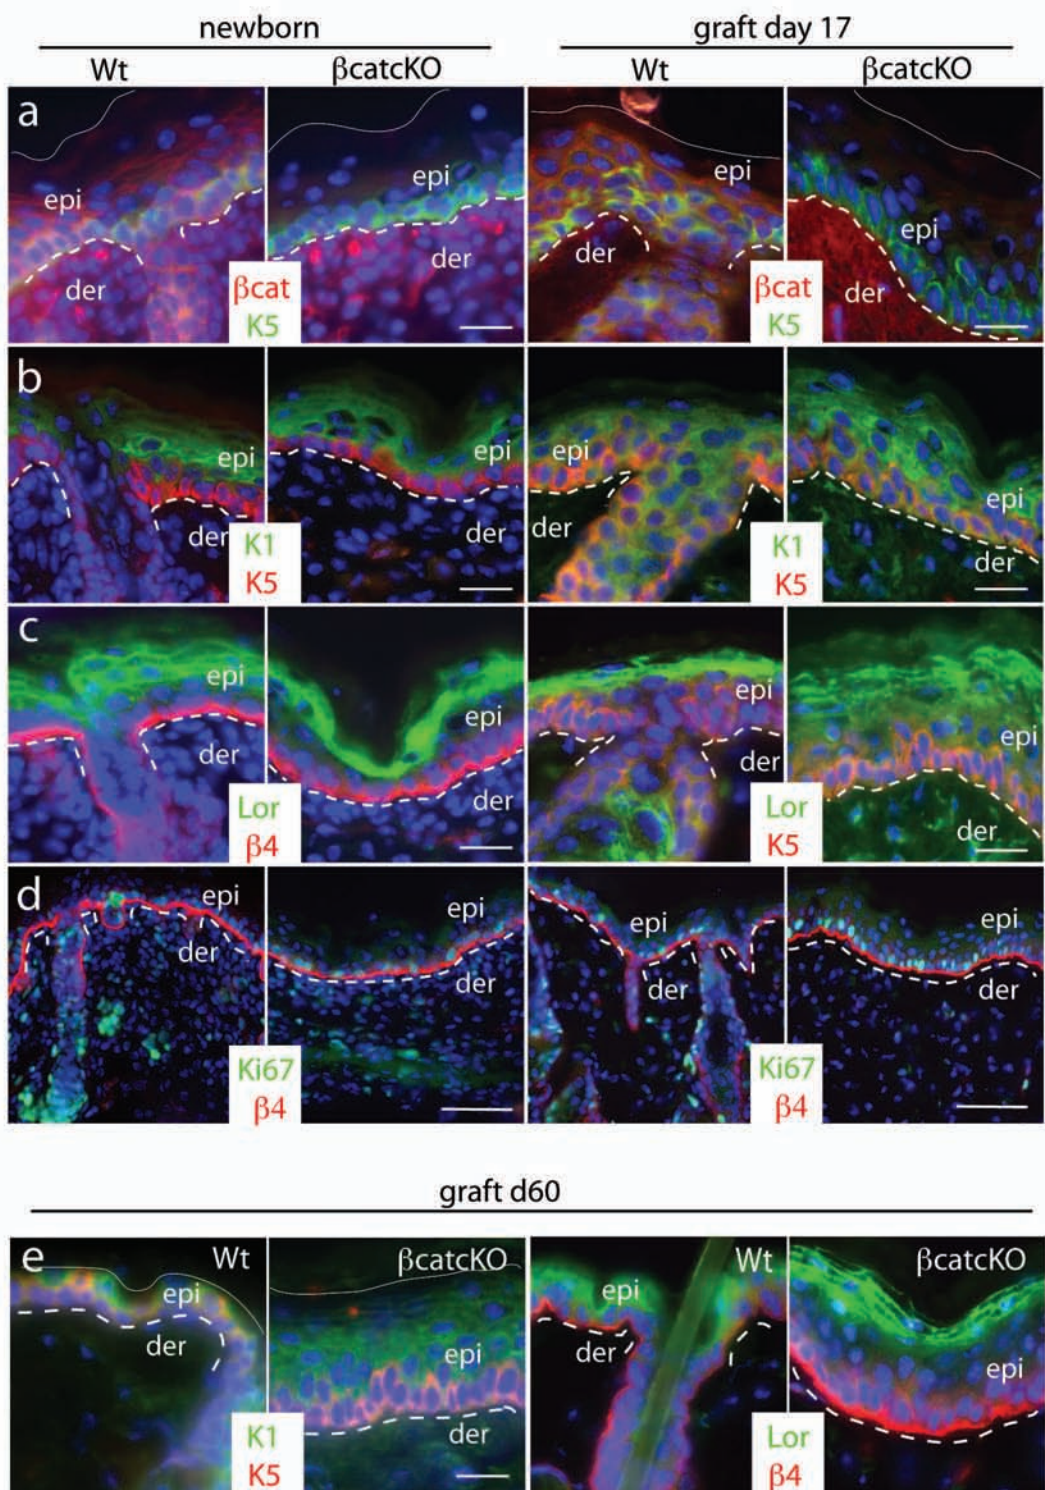

**Supplementary Figure 6.** Analyses of *K14-Cre/ $\beta$ -catenin<sup>fl/fl</sup>* skin at P0 and at d17 and d60 after engraftment. (a)  $\beta$ -catenin immunostaining verified the absence of  $\beta$ -catenin in newborn cKO and engrafted cKO skins (b-c)  $\beta$ -catenin cKO skin lacks hair follicle but still exhibits a seemingly healthy epidermis as previously reported<sup>15</sup>. At newborn or d17 and d60 after grafting,  $\beta$ -catenin cKO epidermis still expresses normal terminal differentiation markers K1 and Loricrin. The numbers of epidermal cells displaying Ki67 immunostaining are even higher in  $\beta$ -catenin cKO than in Wt d17 grafts. This contrasts strikingly with *Tcf3/4* cKO skin grafts at d17, which show little or no Ki67 immunostaining (see main text). Bar denotes 100 $\mu$ m in d, and 20 $\mu$ m the rest of the panels.

**Supplementary Table 1. List of sequences of primers used in cloning and Real Time PCR**

| <b>Real Time Primers</b> | <b>Sequences</b>          |
|--------------------------|---------------------------|
| Actc1 F                  | TCCCCCTGAGCGTAAATACTCTG   |
| Actc1 R                  | GGGCCTGCCTCATCATACTCTT    |
| Adam19F                  | CCTGGGCTCAATTCACCTTCCTTAT |
| Adam19R                  | ACGGGGTACCTTTCCAGTTGG     |
| axin2F                   | TAGTCCCAGAGCCCCTCACAG     |
| axin2R                   | GAACGCTGGCAGACAGGACATA    |
| Basp1F                   | GGGGAGGGAGGCGTTTGA        |
| Basp1R                   | CTAAGTGGGCTCCGTCTGAAAGTT  |
| bcat F exon4             | GAGCTGCCATGTTCCCTGAGA     |
| bcat R exon 4            | CAAGTTCCGCGTCATCCTGATA    |
| BdnfF                    | TGGCGGGACGGTACAGT         |
| BdnfR                    | TAGTTCGGCATTGCGAGTTCC     |
| Cldn4F                   | CAGCGCTACTCTTGCCATTACG    |
| Cldn4R                   | AGAGGCCAGGGTCCCTTCTG      |
| Csrp1 F                  | CCGGGAAGTCCTGGCATAAGT     |
| Csrp1 R                  | CTGAGCCACAAAAGCCAGATACC   |
| Ctgf F                   | GCAGTGGGAATTGTGACCTGAGT   |
| Ctgf R                   | TACCCTGAGCCAGCCATTTCTTA   |
| Cxxc5 F                  | ATCCCCCTACCCCAACAGTG      |
| Cxxc5 R                  | GCTGCGAGCAAGGCTGAGA       |
| cyclin D2 F              | CCGTGCGATACTCTTGCTGACTA   |
| cyclin D2 R              | GTCTCCATCTGCCCCATTTAG     |
| Dkk1F                    | GGAGCACAGAATGGGCAACC      |
| Dkk1R                    | GTGCAAGCTGTCGGTGACCTT     |
| Dlc1F                    | TCCCCAGACCAAGGTCAGAAAG    |
| Dlc1R                    | AAATCGTGGCCACAGTACAAGATG  |
| Etv1 F                   | AAGGGGGCTTTTCCTGTTGC      |
| Etv1 R                   | ATCCGCCATCTTCCTGTTACAAA   |
| Frat2 F                  | GGGCGCCTCTCCTGCTAAA       |
| Frat2 R                  | AGGATGACCGAGCCATTGAATC    |
| gadd45gF                 | GAGCCGCAGCTTCAACGACT      |
| gadd45gR                 | CCGCGCTCCTCGCTCTC         |
| Grrp1 F                  | GGACGCCCCACGGTGTC         |
| Grrp1 R                  | TGGCCCCCTGCCTGTGGT        |
| Hexa F                   | AGGCCAGCCATCAGTGT         |
| Hexa R                   | GGCCGGGAGGCAGTGAA         |
| Hhip F                   | CGGCTGGGAGGGAGACTTCT      |
| Hhip R                   | AGGATACCTGCCCTGGTCACTCT   |
| Klf12F                   | TGCCAGGCAAAGTCACTGA       |
| Klf12R                   | CCGGGTGGCTGTAATAAGACC     |
| Klf2F                    | GCGCGACTGTGGCAGGTT        |
| Klf2R                    | GGGGACCCGAGGGAAATAAGT     |
| Klf9F                    | TCCGCGTACTCGGCTGATG       |
| Klf9R                    | CGTGCCGGTTCGCAAGTTTA      |



|             |                            |
|-------------|----------------------------|
| Lamb1-1F    | CAAGTGCGGCCTTTCAAGAAC      |
| Lamb1-1R    | CCCAAGCCTTCCCAAAGTCA       |
| McamF       | ACCTGGGCACATGGTCACATTAT    |
| McamR       | CGGGAAGCTTGGGCTCAGTA       |
| MdkF        | GGAGCCGACTGCAAATACAAGTT    |
| MdkR        | TTAGTCACGCGGATGGTCTCC      |
| Mef2cF      | GTTTGCCGTATCGTTTTTCTTCCT   |
| Mef2cR      | TATGCCGCTGTGAGCCTCTATTT    |
| Mfge8F      | CTGGGGGAGTTGGACAGGTCT      |
| Mfge8R      | TTGGGTAGCAAGCCAGCAGAG      |
| MycF        | AAGCCACCGCCTACATCCTG       |
| MycR        | AAAGCCCCAGCCAAGGTTG        |
| Nav1F       | TGCTGCCAGCCAGTGC           |
| Nav1R       | AGTATGCGAGGCCTCCAGAATC     |
| Ncam1F      | GAAGGGCAGATGGGAGAGGAC      |
| Ncam1R      | CACCGCAGAGAAAAGCAATGAG     |
| notch4F     | GCTCACTTGTCTCCCCATAGAGT    |
| notch4R     | ACACCCGGCACATCGTAGGT       |
| Npr3F       | TATCGCCGGGCAGGTGTC         |
| Npr3R       | TTCCCGATGTTGCTTTCCTCTT     |
| Nr2f2F      | CGCCGAGTATAGCTGCCTCAA      |
| Nr2f2R      | TCGATGGGGGTTTTACCTACCA     |
| Nr4a2F      | GGGGCATCCTGGATTTAGAAAAC    |
| Nr4a2R      | CATGCCACCCACGCAACA         |
| PdgfrlF     | TCTTGGCCTCCTCTAACAAAGTGA   |
| PdgfrlR     | ATATGTAGTAGCCCGCATCAATGG   |
| Phf17F      | ATGGGGCCTGCCACCAG          |
| Phf17R      | CAGGGGCGTACCCATCATTC       |
| Pim1F       | ATCGGCCCTCCTTTGAAGAAAT     |
| Pim1R       | AGAGGGGCCCAGGACCAGT        |
| Plekhg2F    | CTGATGCCGCTCTCCGTATGT      |
| Plekhg2R    | GGAGGGCCATCTGTGGACAC       |
| PodxlF      | CTGGGGAGGGAGAATGGACTC      |
| PodxlR      | CTGGGGCTCAGGCACAAGTAGG     |
| rtn4F       | AACCCCTAGCAACTGTGTTTA      |
| Rtn4R       | CTCAATACATTACAATGGAGATACTG |
| Socs2F      | GCCGATTGCTTTAACCCAAGTT     |
| Socs2R      | TGGCGAGAAATTTCCCAGATG      |
| SostdcF     | ACGCGCACCTACAAAATCACC      |
| SostdcR     | GGGGGAGGGGATGGAAACTA       |
| Sox11F      | GCTGCCACAGTGGAATAAGC       |
| Sox11R      | AGCAACTGCCCCTGAATAATCC     |
| Sox2F       | AGGGTTCTTGCTGGGTTTTGATT    |
| Sox2R       | CGGTCTTGCCAGTACTTGCTCTC    |
| Tcf3F_exon2 | GGAGCCGGGGCAACCAGTG        |
| Tcf3R_exon2 | CATCCTGGGGCCTTCTCACTTC     |
| Tcf4F       | CACCCGGCCATCGTCACAC        |
| Tcf4R       | GCCACCTGCGCCCGAGAAT        |
| Tubb2bF     | GACCAGTGCGGCAACCAGA        |

Tubb2bR

GGATGGCCCCTAGGCACATA

**Cloning Primers**

Tcf4bR-BamH1R  
Tcf4F166 –BamH1  
Tcf4bR-BamH1  
Tcf4R948-stopXba1  
Tcf4R385  
Tcf4F359 –aattII  
BglII-Tcf4F1  
BglII –stop-Tcf4 R12889  
mycBamH1F824  
mycBamH1R939

**Sequences**

CCGGATCCTCAAAGACTGCAGGGGCGG CACCA  
CCGGATCCATGCAAGACAGCTCCTCCGATTCC  
CCGGATCCTCAAAGACTGCAGGGGCGGCACCA  
CGCTCTAGATCAGGAGTCCGTATGCTTTG AGC  
GATAGGT CCGGGCGACGTCGGTGGGCGAGAGCG  
CGCTCTCGCCACCGACGTCGCCCCGAACCTATC  
GGTAGATCTCTATGCCCGCAGCTGAACGGC  
CGCAGATCTTCAGGTTTCCCCGGCTGCTTG  
CGCGGATCCCCACCATCGCATCAATGC  
GTCTGGATCCCCGCGGCCGCGG
